# Supplementary material
Source: PubMed Central journal article supplement (PMC7673207)
Supplement: mt0c00576_si_001.pdf [file mt0c00576_si_001.pdf]

# Supplementary Information (SI)

## High throughput tailoring of nanocellulose films: from complex bio-based materials to defined multifunctional architectures

Alexey Khakalo<sup>†\*</sup>, Tapio Mäkelä<sup>‡</sup>, Leena-Sisko Johansson<sup>§</sup>, Hannes Orelma<sup>†</sup>, Tekla Tammelin<sup>†\*</sup>

<sup>†</sup> VTT Technical Research Centre of Finland Ltd., Tietotie 4E, P.O. Box 1000, FI-02044 Espoo, Finland

<sup>‡</sup> VTT Technical Research Centre of Finland Ltd., Tietotie 3, FI-02150 Espoo, Finland

<sup>§</sup> Department of Bioproducts and Biosystems, School of Chemical Engineering, Aalto University, P.O. Box 16300, FI-00076 Aalto, Finland

\*Corresponding authors: [alexey.khakalo@vtt.fi](mailto:alexey.khakalo@vtt.fi), Tel. +358504018149

[tekla.tammelin@vtt.fi](mailto:tekla.tammelin@vtt.fi), Tel. +358207224632

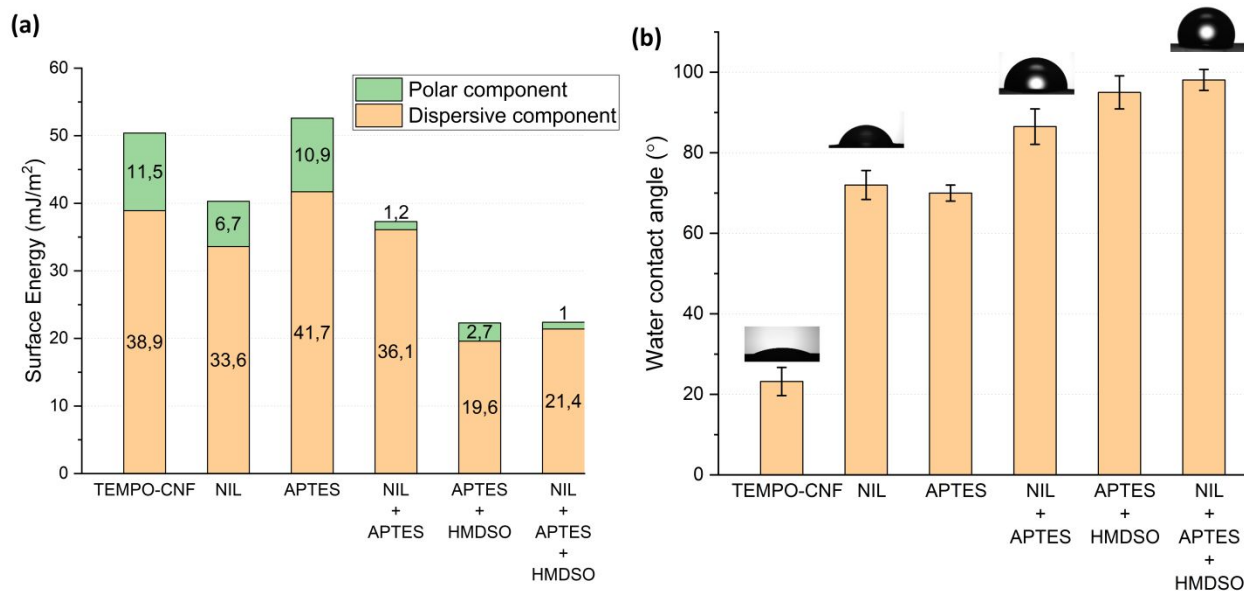

**Figure S1.** Surface energies (a) and water contact angles (b) of NIL surface patterned and APTES and hybrid APTES+HMDSO plasma deposited TEMPO-CNF films.

**Table S1.** Surface free energy parameters for the liquid probes and calculated surface energy components and affinity to water  $\Delta G_{SWS}^{IFE}$  for plasma deposited TEMPO-CNF films with and without NIL surface patterning.

|                                                              | $\gamma^+$ | $\gamma^-$ | $\gamma^p$ | $\gamma^d$ | $\gamma_s$ | $\gamma^-/\gamma^+$ | $\Delta G_{SWS}^{IFE}$ |
|--------------------------------------------------------------|------------|------------|------------|------------|------------|---------------------|------------------------|
| <b>Liquid probes</b>                                         |            |            |            |            |            |                     |                        |
| Water                                                        | 25.5       | 25.5       | 51         | 21.8       | 72.8       | -                   | -                      |
| Formamide                                                    | 2.28       | 39.6       | 19         | 39         | 58         | -                   | -                      |
| Diiodomethane                                                | 0          | 0          | 0          | 50.8       | 50.8       | -                   | -                      |
| Ethylene glycol                                              | 1.92       | 47         | 18.99      | 29         | 47.99      | -                   | -                      |
| <b>Plasma-deposited TEMPO-CNF film</b>                       |            |            |            |            |            |                     |                        |
| Reference                                                    | 0.6        | 53.3       | 11.5       | 38.9       | 50.4       | 85.9                | 33.4                   |
| HMDSO                                                        | 1.0        | 0.3        | 1.0        | 27.7       | 28.7       | 0.3                 | -74.6                  |
| APTES                                                        | 1.7        | 17.5       | 10.9       | 41.8       | 52.7       | 10.3                | -19.4                  |
| APTES+HMDSO                                                  | 2.2        | 0.8        | 2.7        | 19.6       | 22.3       | 0.4                 | -59.5                  |
| <b>NIL patterned TEMPO-CNF films after plasma deposition</b> |            |            |            |            |            |                     |                        |
| Reference                                                    | 1.3        | 8.5        | 6.7        | 33.6       | 40.3       | 6.5                 | -35.9                  |
| HMDSO                                                        | 0.0        | 0.4        | 0.2        | 21.4       | 21.6       | -                   | -86.6                  |
| APTES                                                        | 0.0        | 18.1       | 1.2        | 36.1       | 37.3       | -                   | -19.2                  |
| APTES+HMDSO                                                  | 0.1        | 2.5        | 1.0        | 21.5       | 22.4       | 27.3                | -66.1                  |

$\Delta G_{SWS}^{IFE}$  is given in mJ/m<sup>2</sup>. The standard deviation in the data is less than 5%.
